# Supplementary material
Source: Springer Nature journal article supplement (https://www.springermedizin.de/resource/supplementary/12950_2011_291_MOESM4_ESM.pdf/9557478)

**A**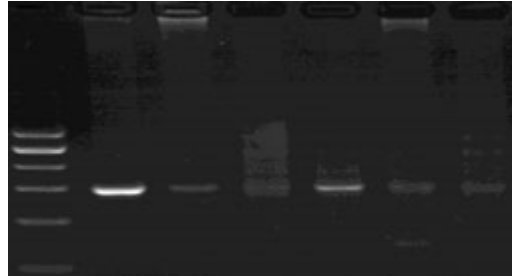**SP-A (295 bp)****M 1 2 3 4 5 6****B**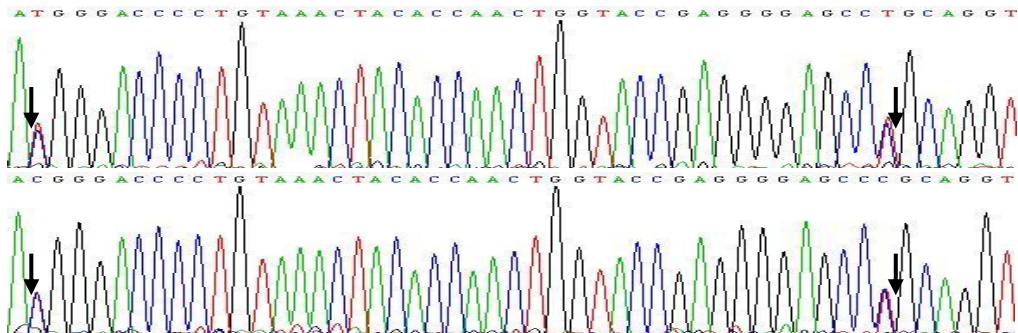**Alveolar  
tissues****HK-2 cells**

Supplement: MOESM4 [file 9557478]
